# Supplementary material
Source: ML conference proceedings conference paper supplement (https://proceedings.neurips.cc/paper_files/paper/2017/hash/a6ea8471c120fe8cc35a2954c9b9c595-Abstract.html)
Supplement: Supplementary file [file a6ea8471c120fe8cc35a2954c9b9c595-Supplemental.zip]

# Scalable Model Selection for Belief Networks

## Supplemental Materials

Zhao Song<sup>†</sup>, Yusuke Muraoka\*, Ryohei Fujimaki\*, Lawrence Carin<sup>†</sup>

<sup>†</sup>Department of ECE, Duke University      \*NEC Data Science Research Laboratories  
 Durham, NC 27708, USA                      Cupertino, CA 95014, USA  
 {zhao.song, lcarin}@duke.edu      {ymuraoka, rfujimaki}@nec-labs.com

### 1 Derivation of Minibatch gFIC in (7)

We first note that an unbiased estimator for (5) is

$$\begin{aligned}
 \widehat{\text{gFIC}}_{\text{SBN}} = & \max_q \mathbb{E}_q \left[ -\frac{M}{2} \sum_j \ln \left( \frac{N_{T+1}}{N_{\text{mini}}} \sum_{i=1}^{N_{\text{mini}}} h_{i+N_T, j} \right) \right. \\
 & \left. + \frac{N_{T+1}}{N_{\text{mini}}} \sum_{i=1}^{N_{\text{mini}}} \ln \frac{p(\mathbf{v}_{i+N_T}, \mathbf{h}_{i+N_T} | \hat{\boldsymbol{\theta}})}{q(\mathbf{h}_{i+N_T} | \phi)} + \frac{MJ - D_{\boldsymbol{\theta}}}{2} \ln N_{T+1} \right] \quad (\text{A1})
 \end{aligned}$$

Simplifying and ignoring constant terms in (A1) leads to  $\widetilde{\text{gFIC}}_{\text{SBN}}$  in (7) of the main text.

### 2 Additional Results

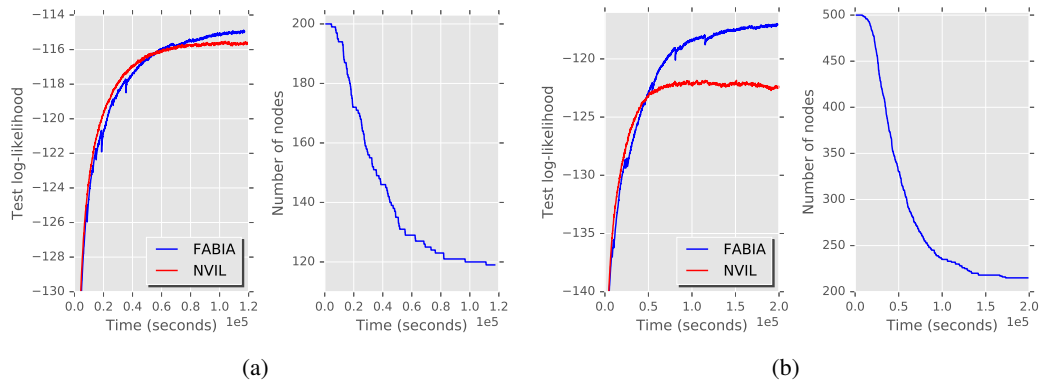

Figure A1: Test log-likelihood and the number of nodes in FABIA, as a function of CPU time on the MNIST dataset, for an SBN with initial size as (a) 200 (b) 500.

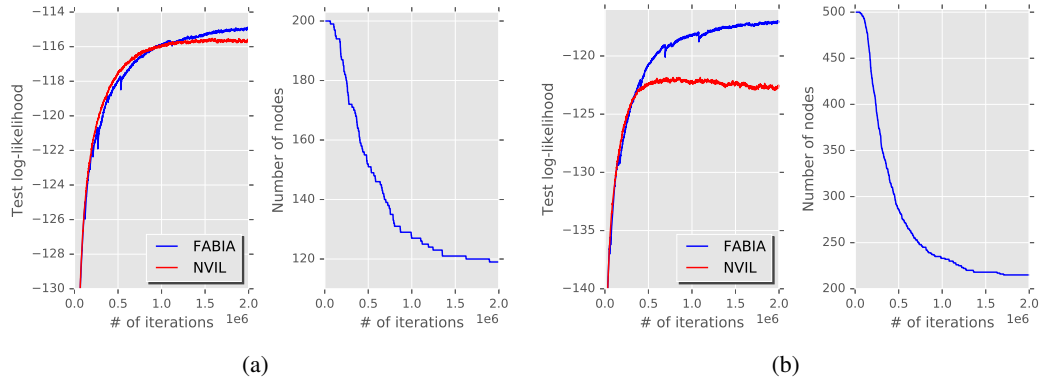

Figure A2: Test log-likelihood and the number of nodes in FABIA, as a function of the number of iterations on the MNIST dataset, for an SBN with initial size as (a) 200 (b) 500.

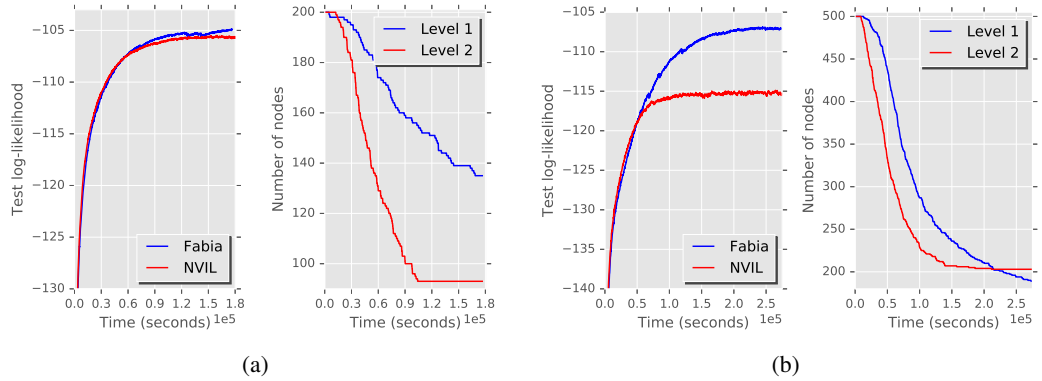

Figure A3: Test log-likelihood and the number of nodes in FABIA, as a function of CPU time on the MNIST dataset, for an SBN with initial size as (a) 200-200 (b) 500-500.

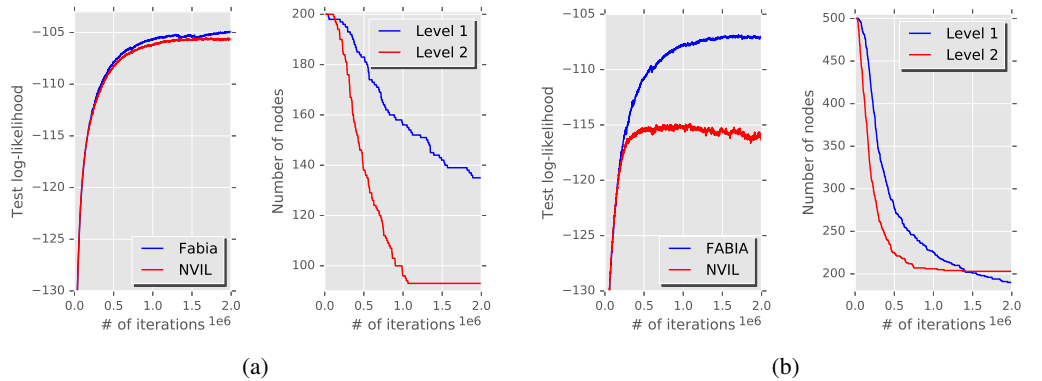

Figure A4: Test log-likelihood and the number of nodes in FABIA, as a function of the number of iterations on the MNIST dataset, for an SBN with initial size as (a) 200-200 (b) 500-500.

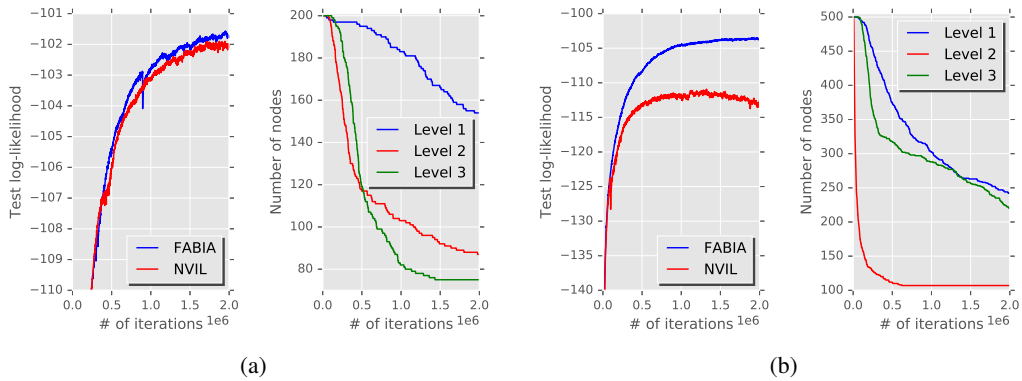

Figure A5: Test log-likelihood and the number of nodes in FABIA, as a function of the number of iterations on the MNIST dataset, for an SBN with initial size as (a) 200-200-200 (b) 500-500-500.

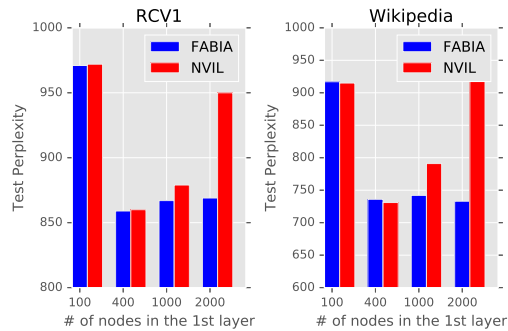

Figure A6: Test perplexities as a function of number of nodes in the first layer, in the three-layer case.

Table 1: Test perplexities and model size on the benchmarks, for NVIL and FABIA with three layers. FABIA starts from a model initialized with 400 hidden units in each layer.

|       | RCV1        |            | Wikipedia   |            |
|-------|-------------|------------|-------------|------------|
|       | Size        | Perplexity | Size        | Perplexity |
| NVIL  | 400-400-400 | 859        | 400-400-400 | 731        |
| FABIA | 398-46-10   | 860        | 400-36-9    | 737        |
